# Supplementary material for: Mapping iron in human heart tissue with synchrotron x-ray fluorescence microscopy and cardiovascular magnetic resonance
Source: Springer Nature journal article supplement (doi:10.1186/s12968-014-0080-2), 2014-09-26

Fe mg/g wet weight

1.4  
1.2  
1.0  
0.8  
0.6  
0.4

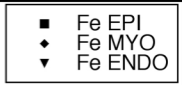

EPICARDIUM

MYOCARDIUM

ENDOCARDIUM

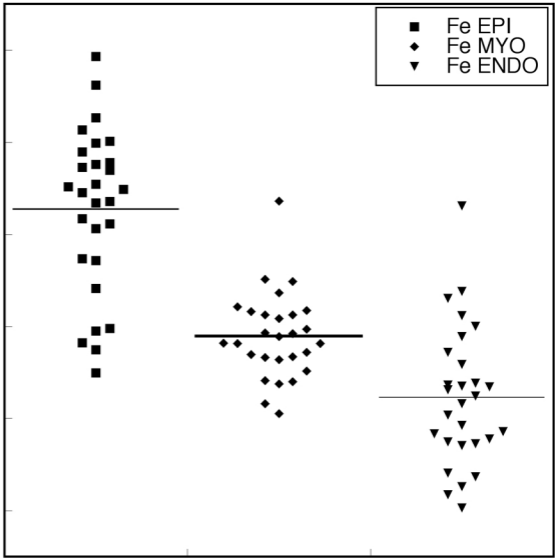

Supplement: MOESM1 [file 9767578]
